# Supplementary material for: Suppressing the chromium disproportionation reaction in O3-type layered cathode materials for high capacity sodium-ion batteries
Source: Royal Society of Chemistry journal article supplement (doi:10.1039/c6ta10818k), 2017-01-01
Supplement: c6ta10818k1.pdf [file c6ta10818k1.pdf]

## Suppressing Chromium Disproportion Reaction in O3-type Layered Cathode Material for High Capacity Sodium-ion Batteries

Ming-Hui Cao,<sup>a</sup> Yong Wang,<sup>c</sup> Zulipiya Shadike,<sup>a</sup> Ji-Li Yue,<sup>a</sup> Enyuan Hu,<sup>d</sup> Seong-Min Bak,<sup>d</sup> Yong-Ning Zhou\*<sup>b</sup> and Xiao-Qing Yang\*<sup>d</sup> and Zheng-Wen Fu\*<sup>a</sup>

<sup>a</sup>Shanghai Key Laboratory of Molecular Catalysts and Innovative Materials, Department of Chemistry & Laser Chemistry Institute, Fudan University, Shanghai, 200433, P.R. China \*E-mail: zwfu@fudan.edu.cn

<sup>b</sup>Department of Materials Science, Fudan University, Shanghai, 200433, P.R. China \*E-mail: zhouyongning@gmail.com

<sup>c</sup>Shanghai Institute of Space Power-Sources, Shanghai, 200245, P.R. China.

<sup>d</sup>Department of Chemistry, Brookhaven National Laboratory, Upton, New York 11973, USA \*E-mail: xyang@bnl.gov

### Electronic Supplementary Information (ESI)

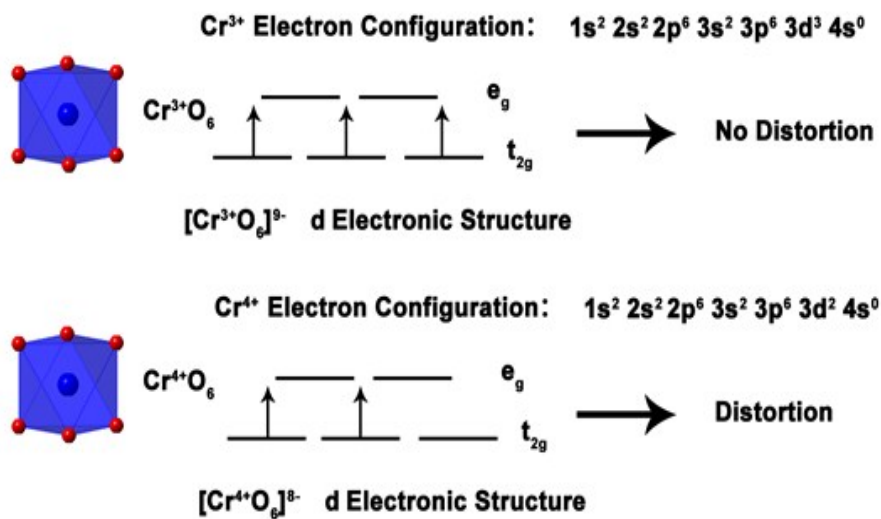

**Figure S1.** Electron configuration and distortion schematics of Cr<sup>3+</sup> and Cr<sup>4+</sup> in CrO<sub>6</sub> octahedral coordination. <sup>[S1]</sup>

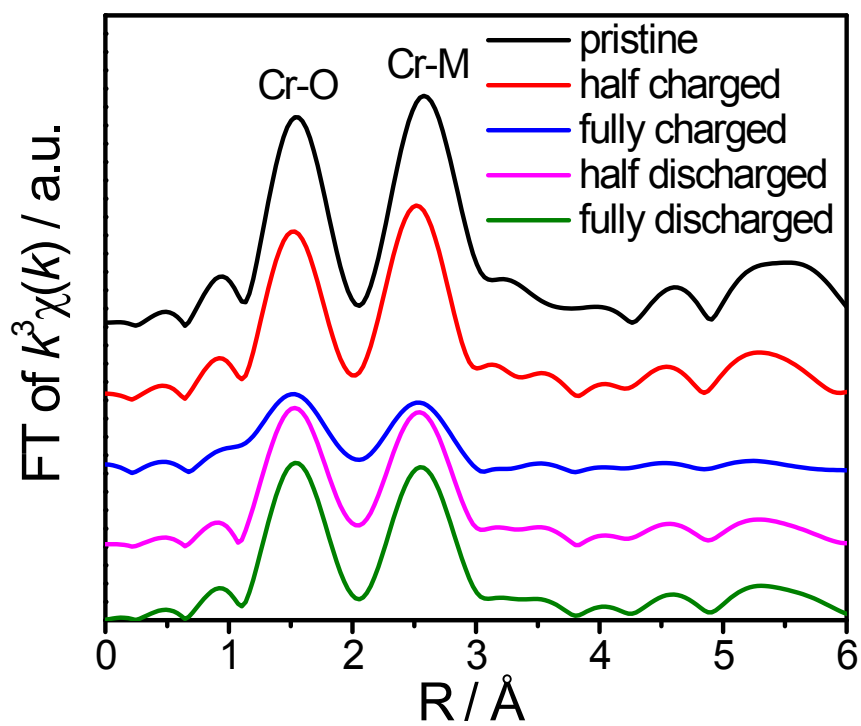

**Figure S2.** Fourier transform X-ray absorption near-edge structure (XANES) spectra at Cr K-edges of NCFM electrodes during the initial cycle.

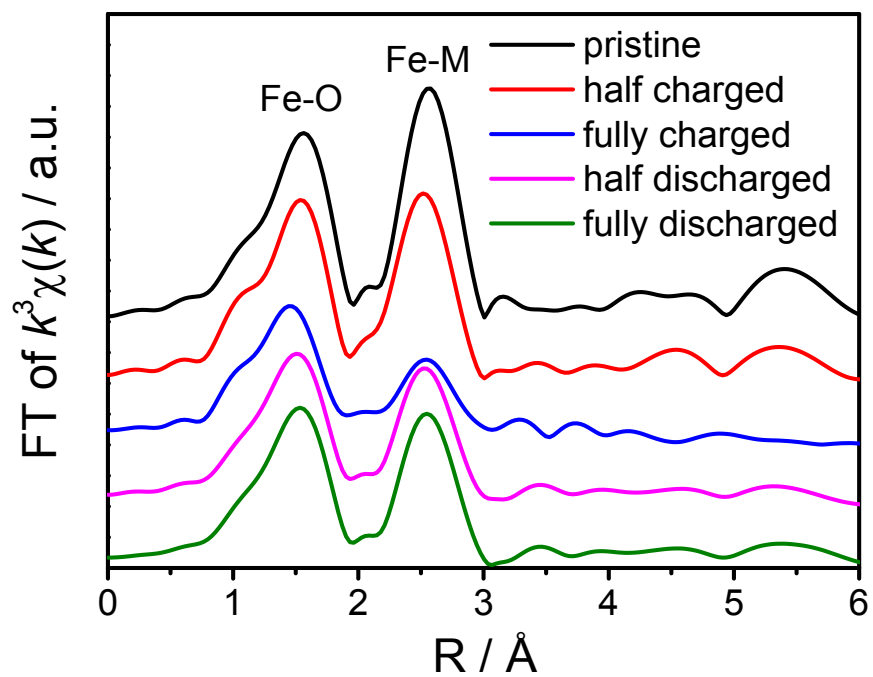

**Figure S3.** Fourier transform X-ray absorption near-edge structure (XANES) spectra at Fe K-edges of NCFM electrodes during the initial cycle.

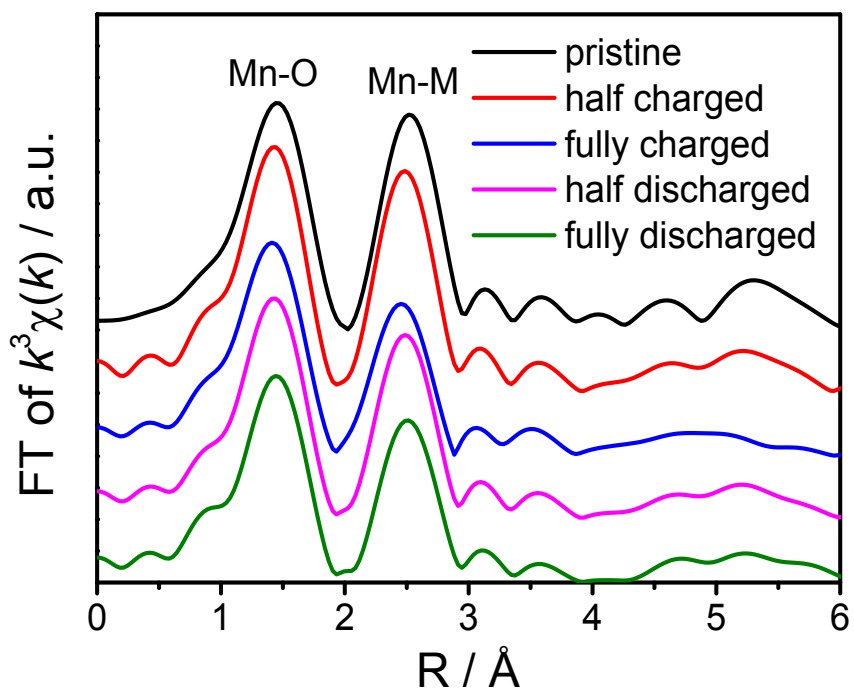

**Figure S4.** Fourier transform X-ray absorption near-edge structure (XANES) spectra at Mn K-edges of NCFM electrodes during the initial cycle.

**Table S1.** Structural parameters and atomic positions of as-prepared O3-type  $\text{NaCr}_{1/3}\text{Fe}_{1/3}\text{Mn}_{1/3}\text{O}_2$  deduced from Rietveld Refinement.

| <i>Atom</i>  | <i>Wyckoff</i>                                    | <i>Occupancy</i>                   | <i>x/a</i>                                     | <i>y/b</i> | <i>z/c</i> |
|--------------|---------------------------------------------------|------------------------------------|------------------------------------------------|------------|------------|
| <i>Na</i>    | 3b                                                | 1                                  | 0                                              | 0          | 0.0        |
| <i>Cr</i>    | 3a                                                | 1/3                                | 0                                              | 0          | 0.5        |
| <i>Fe</i>    | 3a                                                | 1/3                                | 0                                              | 0          | 0.5        |
| <i>Mn</i>    | 3a                                                | 1/3                                | 0                                              | 0          | 0.5        |
| <i>O</i>     | 6c                                                | 1                                  | 0                                              | 0          | 0.230065   |
| <b>R-3m:</b> | <b><math>a = b = 2.9639(4) \text{ \AA}</math></b> |                                    | <b><math>c = 16.1693(5) \text{ \AA}</math></b> |            |            |
|              | <b><math>R_p = 1.91\%</math></b>                  | <b><math>R_{wp} = 2.9\%</math></b> | <b><math>GOF(\chi^2) = 1.102</math></b>        |            |            |

**Table S2.** Comparison of the electrochemical properties of O3-layered cathode materials for sodium ion batteries.

|            | Electrode materials                                                                                               | Voltage Range (V) | Initial Capacity (mAh/g) | Reference        |
|------------|-------------------------------------------------------------------------------------------------------------------|-------------------|--------------------------|------------------|
| unary      | NaNiO <sub>2</sub>                                                                                                | 1.25-3.75         | 125(0.1C)                | S2               |
|            | NaFeO <sub>2</sub>                                                                                                | 1.5-3.6           | 82(0.1C)                 | S3               |
|            | NaTiO <sub>2</sub>                                                                                                | 0.6-1.6           | 152(0.1C)                | S4               |
|            | NaCoO <sub>2</sub>                                                                                                | 2.0-3.8           | 116(0.1C)                | S5               |
|            | α-NaMnO <sub>2</sub>                                                                                              | 2.0-3.8           | 187(0.1C)                | S6               |
|            | β-NaMnO <sub>2</sub>                                                                                              | 2.0-4.2           | No Info.                 | S7               |
|            | NaCrO <sub>2</sub>                                                                                                | 2.0-3.6           | 112(0.1C)                | S8               |
|            | NaCrO <sub>2</sub> /C                                                                                             | 2.0-3.6           | 121(0.1C)                | S8               |
| Binary     | NaNi <sub>0.5</sub> Mn <sub>0.5</sub> O <sub>2</sub>                                                              | 2.2-3.8           | 125(0.033C)              | S9               |
|            | NaFe <sub>0.5</sub> Co <sub>0.5</sub> O <sub>2</sub>                                                              | 2.5-4.0           | 160(0.1C)                | S10              |
|            | NaNi <sub>0.5</sub> Ti <sub>0.5</sub> O <sub>2</sub>                                                              | 2.0-4.0           | 102(0.1C)                | S11              |
|            | NaMn <sub>0.5</sub> Fe <sub>0.5</sub> O <sub>2</sub>                                                              | 1.5-4.2           | 135(0.01C)               | S12              |
|            | NaFe <sub>0.5</sub> Mn <sub>0.5</sub> O <sub>2</sub>                                                              | 1.5-4.2           | 125(0.05C)               | S13              |
| Ternary    | NaNi <sub>0.25</sub> Fe <sub>0.5</sub> Mn <sub>0.25</sub> O <sub>2</sub>                                          | 2.1-3.9           | 140(0.1C)                | S14              |
|            | NaNi <sub>0.33</sub> Mn <sub>0.33</sub> Co <sub>0.33</sub> O <sub>2</sub>                                         | 2.0-3.75          | 120(0.1C)                | S15              |
|            | NaNi <sub>0.33</sub> Fe <sub>0.33</sub> Mn <sub>0.33</sub> O <sub>2</sub>                                         | 2.0-4.0           | 125(0.1C)                | S16              |
|            | NaNi <sub>0.4</sub> Fe <sub>0.2</sub> Mn <sub>0.4</sub> O <sub>2</sub>                                            | 2.0-4.0           | 131(0.1C)                | S17              |
|            | NaNi <sub>0.33</sub> Co <sub>0.33</sub> Fe <sub>0.33</sub> O <sub>2</sub>                                         | 2.0-4.2           | 165(0.1C)                | S18              |
|            | NaFe <sub>0.2</sub> Ni <sub>0.4</sub> Ti <sub>0.4</sub> O <sub>2</sub>                                            | 2.6-3.75          | 120(0.1C)                | S19              |
|            | NaFe <sub>0.2</sub> (Ni <sub>1/2</sub> Ti <sub>1/2</sub> ) <sub>0.6</sub> O <sub>2</sub>                          | 2.0-3.8           | 130(0.05C)               | S20              |
|            | <b>NaFe<sub>0.33</sub>Cr<sub>0.33</sub>Mn<sub>0.33</sub>O<sub>2</sub></b>                                         | <b>1.5-4.2</b>    | <b>186(0.05C)</b>        | <b>This work</b> |
| Quaternary | NaNi <sub>0.25</sub> Fe <sub>0.25</sub> Co <sub>0.25</sub> Mn <sub>0.25</sub> O <sub>2</sub>                      | 1.9-4.3           | 183(0.1C)                | S21              |
|            | NaNi <sub>0.4</sub> Fe <sub>0.2</sub> Mn <sub>0.25</sub> Ti <sub>0.2</sub> O <sub>2</sub>                         | 2.0-4.2           | 145(0.1C)                | S22              |
| Quinary    | NaNi <sub>0.25</sub> Fe <sub>0.25</sub> Co <sub>0.25</sub> Mn <sub>0.125</sub> Ti <sub>0.125</sub> O <sub>2</sub> | 2.0-4.1           | 128(0.1C)                | S23              |

**Tables S3.** Structure parameters from nonlinear least-squares fits to the first two peaks of the Fourier transform at the Cr K-edge EXAFS of NCFM electrode at different states.

| Samples          | Path  | $r/\text{\AA}$      | $\sigma^2 / 10^{-3}\text{\AA}^2$ | $\Delta E/\text{eV}$ | $R$   |
|------------------|-------|---------------------|----------------------------------|----------------------|-------|
| pristine         | Cr-O  | 1.99(1) $\pm$ 0.013 | 0.10 $\pm$ 2.10                  | 0.95 $\pm$ 1.78      | 0.011 |
|                  | Cr-TM | 2.95(9) $\pm$ 0.014 | 1.10 $\pm$ 1.77                  |                      |       |
| half charged     | Cr-O  | 1.95(6) $\pm$ 0.017 | 2.20 $\pm$ 2.84                  | -1.36 $\pm$ 2.32     | 0.018 |
|                  | Cr-TM | 2.92(7) $\pm$ 0.018 | 2.84 $\pm$ 2.33                  |                      |       |
| fully charged    | Cr-O  | 1.97(3) $\pm$ 0.029 | 3.13 $\pm$ 1.86                  | -2.67 $\pm$ 2.18     | 0.005 |
|                  | Cr-TM | 2.93(3) $\pm$ 0.037 | 4.26 $\pm$ 1.47                  |                      |       |
| half discharged  | Cr-O  | 1.97(8) $\pm$ 0.016 | 0.14 $\pm$ 2.66                  | -1.19 $\pm$ 2.41     | 0.019 |
|                  | Cr-TM | 2.94(6) $\pm$ 0.019 | 2.33 $\pm$ 2.44                  |                      |       |
| fully discharged | Cr-O  | 1.98(3) $\pm$ 0.016 | 0.37 $\pm$ 2.41                  | 0.55 $\pm$ 2.30      | 0.002 |
|                  | Cr-TM | 2.95(9) $\pm$ 0.018 | 2.64 $\pm$ 2.36                  |                      |       |

$r$ : bond length;  $\sigma^2$ : Debye-Waller factor (disorder);  $\Delta E$ : inner shell potential shift;  $R$ : R-factor.



**Table S4.** Structure parameters from nonlinear least-squares fits to the first two peaks of the Fourier transform at the Fe K-edge EXAFS of NCFM electrode at different states.

| Samples          | Path  | $r/\text{\AA}$      | $\sigma^2 / 10^{-3}\text{\AA}^2$ | $\Delta E/\text{eV}$ | $R$   |
|------------------|-------|---------------------|----------------------------------|----------------------|-------|
| pristine         | Mn-O  | 1.90(8) $\pm$ 0.008 | 2.55 $\pm$ 1.25                  | -4.38 $\pm$ 1.20     | 0.006 |
|                  | Mn-TM | 2.94(9) $\pm$ 0.009 | 3.90 $\pm$ 1.05                  |                      |       |
| half charged     | Mn-O  | 1.90(2) $\pm$ 0.010 | 2.78 $\pm$ 1.59                  | -4.74 $\pm$ 1.51     | 0.010 |
|                  | Mn-TM | 2.93(2) $\pm$ 0.011 | 4.10 $\pm$ 1.34                  |                      |       |
| fully charged    | Mn-O  | 1.89(4) $\pm$ 0.014 | 7.79 $\pm$ 1.84                  | -5.09 $\pm$ 1.80     | 0.013 |
|                  | Mn-TM | 2.91(9) $\pm$ 0.011 | 3.75 $\pm$ 2.55                  |                      |       |
| half discharged  | Mn-O  | 1.90(2) $\pm$ 0.009 | 2.88 $\pm$ 1.48                  | -4.82 $\pm$ 1.44     | 0.009 |
|                  | Mn-TM | 2.93(8) $\pm$ 0.011 | 5.07 $\pm$ 1.32                  |                      |       |
| fully discharged | Mn-O  | 1.91(2) $\pm$ 0.009 | 2.25 $\pm$ 1.53                  | -3.57 $\pm$ 1.52     | 0.010 |
|                  | Mn-TM | 2.95(7) $\pm$ 0.012 | 4.92 $\pm$ 1.41                  |                      |       |

$r$ : bond length;  $\sigma^2$ : Debye-Waller factor (disorder);  $\Delta E$ : inner shell potential shift;  $R$ : R-factor.

**Table S5.** Structure parameters from nonlinear least-squares fits to the first two peaks of the Fourier transform at the Mn K-edge EXAFS of NCFM electrode at different states.

| Samples          | Path  | $r/\text{\AA}$      | $\sigma^2 / 10^{-3}\text{\AA}^2$ | $\Delta E/\text{eV}$ | $R$   |
|------------------|-------|---------------------|----------------------------------|----------------------|-------|
| pristine         | Fe-O  | 2.03(1) $\pm$ 0.006 | 4.72 $\pm$ 0.90                  | -0.83 $\pm$ 0.61     | 0.002 |
|                  | Fe-TM | 2.98(2) $\pm$ 0.005 | 4.21 $\pm$ 0.65                  |                      |       |
| half charged     | Fe-O  | 2.01(4) $\pm$ 0.005 | 6.58 $\pm$ 0.85                  | -1.23 $\pm$ 0.55     | 0.002 |
|                  | Fe-TM | 2.96(8) $\pm$ 0.005 | 6.62 $\pm$ 0.64                  |                      |       |
| fully charged    | Fe-O  | 1.96(6) $\pm$ 0.014 | 8.43 $\pm$ 2.40                  | -1.40 $\pm$ 1.73     | 0.013 |
|                  | Fe-TM | 2.98(0) $\pm$ 0.020 | 14.01 $\pm$ 2.55                 |                      |       |
| half discharged  | Fe-O  | 2.00(0) $\pm$ 0.007 | 7.20 $\pm$ 1.19                  | -1.34 $\pm$ 0.79     | 0.003 |
|                  | Fe-TM | 2.98(4) $\pm$ 0.008 | 8.54 $\pm$ 0.97                  |                      |       |
| fully discharged | Fe-O  | 2.01(5) $\pm$ 0.006 | 6.32 $\pm$ 1.09                  | -0.95 $\pm$ 0.73     | 0.003 |
|                  | Fe-TM | 2.99(5) $\pm$ 0.007 | 7.08 $\pm$ 0.86                  |                      |       |

$r$ : bond length;  $\sigma^2$ : Debye-Waller factor (disorder);  $\Delta E$ : inner shell potential shift;  $R$ : R-factor.

**Tables S6.** Electronegativity parameters of ions in NCFM. [S24]

| ions                        | Z*               | r/Å                               | X <sub>i</sub> |
|-----------------------------|------------------|-----------------------------------|----------------|
| Fe <sup>3+</sup>            | 4.95             | 1.24                              | 1.9            |
| Cr <sup>4+</sup>            | 5.5              | 1.85                              | 3.917          |
| Mn <sup>4+</sup>            | 5.65             | 1.79                              | 4.09           |
| Z*:effective nuclear number | r:atomic radius; | X <sub>i</sub> :electronegativity |                |

$$X_{\text{Fe}^{3+}} < X_{\text{Cr}^{4+}} < X_{\text{Mn}^{4+}}$$

Electronic Configuration of Ions: 1s<sup>2</sup>2s<sup>2</sup>2p<sup>6</sup>3s<sup>2</sup>3p<sup>6</sup>3d<sup>y</sup>4s<sup>0</sup>

Correlation Formula:

$$Z^* = Z - [0 \times 0.35 + (8+y) \times 0.85 + 10 \times 1.0]$$

$$3.59 \times 10^3 \times Z^* \text{ (pm)}^2$$

$$X_i = \frac{r^2}{Z^*} + 0.744$$

## References

- [S1] T.P. Zhang., Journal of Higher Correspondence Education (Natural Sciences). 2003, **16**,31.
- [S2] X. H. Ma, H. L. Chen and G. Ceder, *J. Electrochem. Soc.* 2011, **158**, A1307.
- [S3] N. Yabuuchi, H. Yoshida and S. Komaba, *Electrochemistry* 2012, **80**, 716.
- [S4] D. Wu, X. Li, B. Xu, N. Twu, L. Liu and G. Ceder. *Energy Environ. Sci.* 2015, **8**, 195.
- [S5] T. Shibata, Y. Fukuzumi, W. Kobayashi and Yutaka Moritomo, *Sci. Rep.* 2015, **5**, 9006.
- [S6] X. H. Ma, H. L. Chen and G. Ceder, *J. Electrochem. Soc.* 2011, **158**, A1307.
- [S7] J. Billaud, R. J. Clement, A. R. Armstrong, J. Canales-Vazquez, P. Rozier, C. P. Grey and P. G. Bruce, *J. Am. Chem. Soc.* 2014, **136**, 17243.
- [S8] C. Y. Yu, J. S. Park, H. G. Jung, K. Y. Chung, D. Aurbach, Y. K. Sun and S. T. Myung, *Energy Environ. Sci.* 2015, **8**, 2019-2026
- [S9] S. Komaba, N. Yabuuchi, T. Nakayama, A. Ogata, T. Ishikawa and I. Nakai, *Inorg. Chem.* 2012, **51**,6211.
- [S10] H. Yoshida, N. Yabuuchi and S. Komaba, *Electrochem. Commun.* 2013, **34**, 60.
- [S11] H. J. Yu, S. H. Guo, Y. B. Zhu, M. Ishida and H. S. Zhou, *Chem. Commun.* 2014, **50**, 457.
- [S12] B. Mortemard de Boisse, D. Carlier, M. Guignard and C. Delmas, *J. Electrochem. Soc.* 2013, **160**, A569.
- [S13] N. Yabuuchi, M. Kajiyama, J. Iwatat, H. Nishikawa, S. Hitomi, R. Okuyama, R. Usui, Y. Yamada, S. Komaba, *Nat. Mater.* 2012, **11**, 512.
- [S14] S. M. Oh, S. T. Myung, C. S. Yoon, J. Lu, J. Hassoun, B. Scrosati, K. Amine and Y. K. Sun, *NanoLett.* 2014, **4**, 1620.
- [S15] M. Sathiya, K. Hemalatha, K. Ramesha, J.-M. Tarascon and A. S. Prakash, *Chem. Mater.*, 2012, **24**,1846.
- [S16] D. Kim, E. Lee, M. Slater, W. Lu, S. Rood and C.S. Johnson, *Electrochem. Commun.* 2012, **18**, 66.
- [S17] D. D. Yuan, Y. X. Wang, Y. L. Cao, X. P. Ai and H. X. Yang, *ACS Appl. Mater. Interfaces*, 2015, **7**, 8585.
- [S18] P. Vassilaras, A. J. Toumar and G. Ceder, *Electrochem. Commun.* 2014, **38**, 79.
- [S19] G. Singh, F. Aguesse, L. Otaegui, E. Goikolea, E. Gonzalo, J Segalini and T. Rojo. *J. Power Sources* 2015, **273**, 333.
- [S20] N. Yabuuchi, M. Yano, H. Yoshida, S. Kuze and S. Komaba, *J. Electrochem. Soc.* 2013, **160**, A3131.
- [S21] X. Li, D. Wu, Y. N. Zhou, L. Liu, X. Q. Yang and G. Ceder, *Electrochem. Commun.* 2014, **49**, 51.
- [S22] X. Sun, Y. Jin, C. Y. Zhang, J. W. Wen, Y. Shao, Y. Zang and C. H. Chen, *J. Mater. Chem. A* 2014, **2**, 17268.
- [S23] J. L. Yue, W. W. Yin, M. H. Cao, S. Zulipiya, Y. N. Zhou and Z.W. Fu, *Chem. Comm.* 2015 **51**, 15712.
- [S24] X. H. Yuan, Y. Li, Guangzhou Chemical Industry 2002, **30**, 134.
